# Supplementary material
Source: PubMed Central journal article supplement (PMC1299238)

Running title: Structure of Mil, an archaeal Imp4-like protein.

Authors: Ng *et al.*

### ***Supplementary information***

**Fig 1.** Stereo-view of the electron density map ( $2DF_o - mF_c$ ) in the region around the disulphide bridge. The map is shown at  $1\sigma$  level. Secondary structural elements are colored as in Fig 2. A dashed line represents the hydrogen bond between Glu101 and Gly99. The electron density shows that the two cysteines present in the molecule form a disulphide bridge. Since these cysteines are not conserved, not even within the archaeal group, this disulphide bridge seems to be a unique feature in the structure of Mil. Cys96 is in the middle of the loop connecting the  $\beta F$  strand to the  $\alpha 3$  helix, while Cys104 sits on the latter helix. Thus, the disulphide bridge is likely to stabilize the conformation of the loop containing Cys104. Further stabilization could be attained by a hydrogen bond between the side chain of Glu101 and the backbone amide of Gly99.

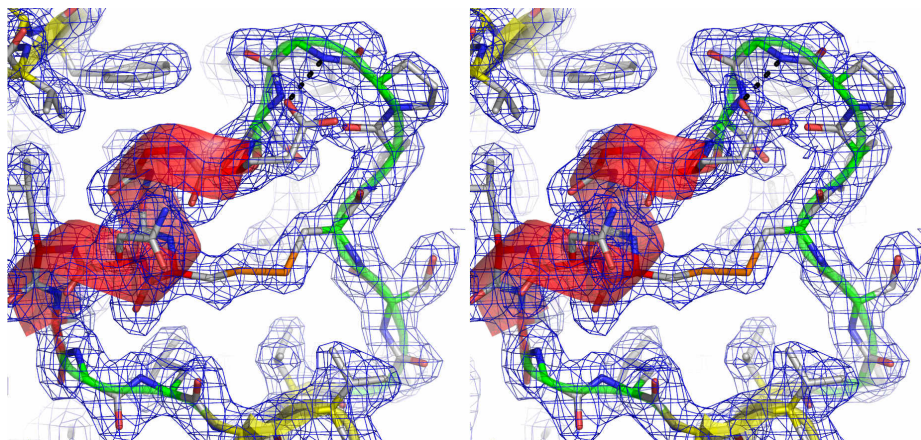

Supplement: 6-7400328s1.pdf [file 6-7400328s1.pdf]
